# Supplementary material for: Epigenetic inactivation of HOXA11, a novel functional tumor suppressor for renal cell carcinoma, is associated with RCC TNM classification
Source: PubMed Central journal article supplement (PMC5400629; doi:10.18632/oncotarget.15668), 2017-02-24
Supplement: oncotarget-08-21861-s001.pdf [file oncotarget-08-21861-s001.pdf]

## Epigenetic inactivation of *HOXA11*, a novel functional tumor suppressor for renal cell carcinoma, is associated with RCC TNM classification

### SUPPLEMENTARY MATERIAL

Supplementary Table 1: Primers for PCR, MSP and BGS

| Primer Name       | Sequence                | Size | Tm    |
|-------------------|-------------------------|------|-------|
| <i>β-actin</i> -R | TCCTGTGGCATCCACGAAACT   | 315  | 61.9  |
| <i>β-actin</i> -F | GAAGCATTGCGGTGGACGAT    |      | 61.8  |
| <i>HOXA11</i> -F  | CAGCAGAGGAGAAAGAGCGG    | 152  | 59.4  |
| <i>HOXA11</i> -R  | CAGCTCTCGGATCTGGTACT    |      | 60.1  |
| <i>HOXA11</i> -MF | TTTTAGGTTTAATTCGTGCGC   | 113  | 60.1  |
| <i>HOXA11</i> -MR | ACGAACTCCTCCGCGAAATA    |      | 59.5  |
| <i>HOXA11</i> -UF | TTTAGGTTTAATTTGTGTGT    | 112  | 54.4  |
| <i>HOXA11</i> -UR | ACAAACTCCTCCACAAAATA    |      | 53.8  |
| HOXA11-BF         | TTAATTTGTTTTAGGTTTAAT   | 274  | 50    |
| HOXA11-BR         | AAAACCTATAACAAAAC       |      | 48.6  |
| MMP-9F            | GGGACGCAGACATCGTCATC    | 139  | 60.87 |
| MMP-9R            | TCGTCATCGTCGAAATGGGC    |      | 60.8  |
| MMP-2F            | GATACCCCTTTGACGGTAAGGA  | 112  | 59.23 |
| MMP-2R            | CCTTCTCCCAAGGTCCATAGC   |      | 59.86 |
| c-myc-F           | GTCAAGAGGCGAACACACAAC   | 162  | 60.00 |
| c-myc-R           | TTGGACGGACAGGATGTATGC   |      | 60.13 |
| cyclinD1-F        | GCTGCGAAGTGGAAACCATC    | 135  | 59.83 |
| cyclinD1-R        | CCTCCTTCTGCACACATTTGAA  |      | 59.11 |
| Caspase7-F        | CGGTCCTCGTTTGTACCGTC    | 206  | 60.73 |
| Caspase7-R        | CGCCCATACCTGTCACTTTATCA |      | 60.43 |
| Caspase9-F        | CTCAGACCAGAGATTCGCAAAC  | 116  | 59.33 |
| Caspase9-R        | GCATTTCCCTCAAACCTCTCAA  |      | 58.84 |
